# Supplementary material for: Dynamic recurrence risk and adjuvant chemotherapy benefit prediction by ctDNA in resected NSCLC
Source: PubMed Central journal article supplement (PMC8605017; doi:10.1038/s41467-021-27022-z), 2021-11-19
Supplement: 41467_2021_27022_MOESM7_ESM.pdf [file 41467_2021_27022_MOESM7_ESM.pdf]

## Reporting Summary

Nature Research wishes to improve the reproducibility of the work that we publish. This form provides structure for consistency and transparency in reporting. For further information on Nature Research policies, see our [Editorial Policies](#) and the [Editorial Policy Checklist](#).

### Statistics

For all statistical analyses, confirm that the following items are present in the figure legend, table legend, main text, or Methods section.

n/a Confirmed

- |                                     |                                     |                                                                                                                                                                                                                                                            |
|-------------------------------------|-------------------------------------|------------------------------------------------------------------------------------------------------------------------------------------------------------------------------------------------------------------------------------------------------------|
| <input type="checkbox"/>            | <input checked="" type="checkbox"/> | The exact sample size ( $n$ ) for each experimental group/condition, given as a discrete number and unit of measurement                                                                                                                                    |
| <input type="checkbox"/>            | <input checked="" type="checkbox"/> | A statement on whether measurements were taken from distinct samples or whether the same sample was measured repeatedly                                                                                                                                    |
| <input type="checkbox"/>            | <input checked="" type="checkbox"/> | The statistical test(s) used AND whether they are one- or two-sided<br><i>Only common tests should be described solely by name; describe more complex techniques in the Methods section.</i>                                                               |
| <input type="checkbox"/>            | <input checked="" type="checkbox"/> | A description of all covariates tested                                                                                                                                                                                                                     |
| <input checked="" type="checkbox"/> | <input type="checkbox"/>            | A description of any assumptions or corrections, such as tests of normality and adjustment for multiple comparisons                                                                                                                                        |
| <input type="checkbox"/>            | <input checked="" type="checkbox"/> | A full description of the statistical parameters including central tendency (e.g. means) or other basic estimates (e.g. regression coefficient) AND variation (e.g. standard deviation) or associated estimates of uncertainty (e.g. confidence intervals) |
| <input type="checkbox"/>            | <input checked="" type="checkbox"/> | For null hypothesis testing, the test statistic (e.g. $F$ , $t$ , $r$ ) with confidence intervals, effect sizes, degrees of freedom and $P$ value noted<br><i>Give <math>P</math> values as exact values whenever suitable.</i>                            |
| <input checked="" type="checkbox"/> | <input type="checkbox"/>            | For Bayesian analysis, information on the choice of priors and Markov chain Monte Carlo settings                                                                                                                                                           |
| <input checked="" type="checkbox"/> | <input type="checkbox"/>            | For hierarchical and complex designs, identification of the appropriate level for tests and full reporting of outcomes                                                                                                                                     |
| <input checked="" type="checkbox"/> | <input type="checkbox"/>            | Estimates of effect sizes (e.g. Cohen's $d$ , Pearson's $r$ ), indicating how they were calculated                                                                                                                                                         |

*Our web collection on [statistics for biologists](#) contains articles on many of the points above.*

### Software and code

Policy information about [availability of computer code](#)

Data collection

Data analysis

For manuscripts utilizing custom algorithms or software that are central to the research but not yet described in published literature, software must be made available to editors and reviewers. We strongly encourage code deposition in a community repository (e.g. GitHub). See the Nature Research [guidelines for submitting code & software](#) for further information.

### Data

Policy information about [availability of data](#)

All manuscripts must include a [data availability statement](#). This statement should provide the following information, where applicable:

- Accession codes, unique identifiers, or web links for publicly available datasets
- A list of figures that have associated raw data
- A description of any restrictions on data availability

All raw targeted DNA-sequencing data have been deposited in the National Genomics Data Center (NGDC) under the accession code HRA001346 (<https://bigd.big.ac.cn/gsa-human/browse/HRA001346>). The deposited and publicly available data are compliant with the regulations of the Ministry of Science and

Technology of the People's Republic of China. The raw sequencing data contain information unique to individuals and are available under controlled access. Access to the data can be requested by completing the application form via GSA-Human System and is granted by the corresponding Data Access Committee. Additional guidance can be found at the GSA-Human System website [[https://ngdc.cnbc.ac.cn/gsa-human/document/GSA-Human\\_Request\\_Guide\\_for\\_Users\\_us.pdf](https://ngdc.cnbc.ac.cn/gsa-human/document/GSA-Human_Request_Guide_for_Users_us.pdf)]. Data used for survival analysis and joint model construction and evaluation are publicly available at <https://github.com/cancer-oncogenomics/ctDNA-dynamic-prediction-lung-cancer>. All specific mutation genomic locations and allele frequencies are available in Supplementary Data 2. Source data are provided with this paper.

## Field-specific reporting

Please select the one below that is the best fit for your research. If you are not sure, read the appropriate sections before making your selection.

Life sciences       Behavioural & social sciences       Ecological, evolutionary & environmental sciences

For a reference copy of the document with all sections, see [nature.com/documents/nr-reporting-summary-flat.pdf](https://nature.com/documents/nr-reporting-summary-flat.pdf)

## Life sciences study design

All studies must disclose on these points even when the disclosure is negative.

|                 |                                                                                                                                                                                                                                                                                                                                                                                             |
|-----------------|---------------------------------------------------------------------------------------------------------------------------------------------------------------------------------------------------------------------------------------------------------------------------------------------------------------------------------------------------------------------------------------------|
| Sample size     | This study included 397 plasma samples from 103 patients with resectable NSCLC. Sample size was not predetermined based on statistical methods, but was chosen on the basis of prior studies that showed significant effects with similar sample sizes (Abbosh, Christopher, et al. Nature 545.7655 (2017): 446-451; Chaudhuri, Aadel A., et al. Cancer discovery 7.12 (2017): 1394-1403.). |
| Data exclusions | 13 patients who lost to follow up, withdrew consent, and with SCLC or with non-cancer causes of death were excluded.                                                                                                                                                                                                                                                                        |
| Replication     | This study is a cohort study and therefore is not applicable for experimental replication.                                                                                                                                                                                                                                                                                                  |
| Randomization   | There is no randomization as part of this study. Patients were enrolled based on their cancer types and were not allocated into experimental groups.                                                                                                                                                                                                                                        |
| Blinding        | Investigators who collected and processed samples were blinded to survival outcomes while conducting the ctDNA measurements. Blinding was not applicable for analyses involving comparison of patient groups based on their clinical outcomes.                                                                                                                                              |

## Reporting for specific materials, systems and methods

We require information from authors about some types of materials, experimental systems and methods used in many studies. Here, indicate whether each material, system or method listed is relevant to your study. If you are not sure if a list item applies to your research, read the appropriate section before selecting a response.

### Materials & experimental systems

| n/a                                 | Involved in the study                                           |
|-------------------------------------|-----------------------------------------------------------------|
| <input checked="" type="checkbox"/> | <input type="checkbox"/> Antibodies                             |
| <input checked="" type="checkbox"/> | <input type="checkbox"/> Eukaryotic cell lines                  |
| <input checked="" type="checkbox"/> | <input type="checkbox"/> Palaeontology and archaeology          |
| <input checked="" type="checkbox"/> | <input type="checkbox"/> Animals and other organisms            |
| <input type="checkbox"/>            | <input checked="" type="checkbox"/> Human research participants |
| <input type="checkbox"/>            | <input checked="" type="checkbox"/> Clinical data               |
| <input checked="" type="checkbox"/> | <input type="checkbox"/> Dual use research of concern           |

### Methods

| n/a                                 | Involved in the study                           |
|-------------------------------------|-------------------------------------------------|
| <input checked="" type="checkbox"/> | <input type="checkbox"/> ChIP-seq               |
| <input checked="" type="checkbox"/> | <input type="checkbox"/> Flow cytometry         |
| <input checked="" type="checkbox"/> | <input type="checkbox"/> MRI-based neuroimaging |

## Human research participants

Policy information about [studies involving human research participants](#)

|                            |                                                                                                                                                                                                                                                                                                                                                                                                    |
|----------------------------|----------------------------------------------------------------------------------------------------------------------------------------------------------------------------------------------------------------------------------------------------------------------------------------------------------------------------------------------------------------------------------------------------|
| Population characteristics | Median age: 64 years (range from 38 to 82). Sex: 35% females. Smoking status: 59% smoking.                                                                                                                                                                                                                                                                                                         |
| Recruitment                | Patients in this study were recruited at the Cancer Hospital of Chinese Academy of Medical Sciences from 2018 to 2020 (ChiCTR1900024656). Patients who were aged at $\geq 18$ years old (including both males and females) and with resectable non-small cell lung cancer confirmed by histology and/or cytology were included. Potential self-selection bias or other biases were not identified. |
| Ethics oversight           | The study was approved by the Ethics Committee of Cancer Hospital, Chinese Academy of Medical Sciences and Peking Union Medical College. All patients provided oral and written informed consent.                                                                                                                                                                                                  |

Note that full information on the approval of the study protocol must also be provided in the manuscript.

## Clinical data

Policy information about [clinical studies](#)

All manuscripts should comply with the ICMJE [guidelines for publication of clinical research](#) and a completed [CONSORT checklist](#) must be included with all submissions.

|                             |                                                                                                                                                                                                                                                                                                                                                                                                                                                                                 |
|-----------------------------|---------------------------------------------------------------------------------------------------------------------------------------------------------------------------------------------------------------------------------------------------------------------------------------------------------------------------------------------------------------------------------------------------------------------------------------------------------------------------------|
| Clinical trial registration | This study was registered at Chinese Clinical Trial Registry (ChiCTR) (ChiCTR1900024656; data of registration 20/07/2019).                                                                                                                                                                                                                                                                                                                                                      |
| Study protocol              | Study protocol will be available with publication.                                                                                                                                                                                                                                                                                                                                                                                                                              |
| Data collection             | Patients were enrolled at Cancer Hospital Chinese Academy of Medical Sciences from 2018 to 2020. Tumor tissues were collected at surgery and pretreatment blood samples were collected before surgery. The first post-surgical blood samples were collected within 30 days after surgery. Patients were then scheduled to be followed every 3 months with computed tomography scan and blood collections until recurrences determined by computed tomography (CT) scan results. |
| Outcomes                    | Primary outcome was recurrence measured by the CT imaging diagnostic result. Secondary outcome was ctDNA mutations measured by the NGS analysis.                                                                                                                                                                                                                                                                                                                                |
